# Supplementary material for: A Tale of Two Dust Storms : analysis of a complex dust event in the Middle East
Source: Copernicus journal article supplement (doi:10.5194/amt-12-5101-2019), 2019-09-24
Supplement: Supplementary file [file amt-12-5101-2019-supplement-title-page.pdf › amt-12-5101-2019-supplement-title-page.pdf]

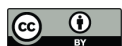

## *Supplement of*

# ***A Tale of Two Dust Storms: analysis of a complex dust event in the Middle East***

**Steven D. Miller et al.**

*Correspondence to:* Steven D. Miller ([steven.miller@colostate.edu](mailto:steven.miller@colostate.edu))

- [amt-12-5101-2019-supplement-title-page.pdf](#)
- [SUPP\\_MOVIE\\_1\\_WRFCHEM\\_INTDUST.gif](#)
- [SUPP\\_MOVIE\\_2\\_DEBRA\\_msg\\_s20160804\\_0000\\_e20160804\\_1000.gif](#)
- [SUPP\\_MOVIE\\_3\\_WRFCHEM\\_TPW.gif](#)

The copyright of individual parts of the supplement might differ from the CC BY 4.0 License.
